# Supplementary material for: Syngenta Uses a Cover Optimizer to Determine Production Volumes for Its European Seed Supply Chain
Source: Atypon-hosted journal article supplement (doi:10.1287/inte.2015.0812), 2015-12-01
Supplement: inte.2015.0812-sm.pdf [file inte.2015.0812-sm.pdf]

# Syngenta Uses a Cover Optimizer to Determine Production Volumes for Its European Seed Supply Chain

## Supplemental Material – Proofs

Peter Comhaire

Syngenta Supply AG, Basel, Switzerland, peter.comhaire@syngenta.com

Felix Papier

ESSEC Business School, Cergy, France, papier@essec.edu

### Proof of Proposition 1

A discrete function  $f(\mathbf{x})$  is said to be concave ( $i=j$ ) and submodular ( $i \neq j$ ) in the components of  $\mathbf{x}$  if  $f(\mathbf{x}+\mathbf{e}_i+\mathbf{e}_j)-f(\mathbf{x}+\mathbf{e}_i)-f(\mathbf{x}+\mathbf{e}_j)+f(\mathbf{x}) \leq 0$  for all  $\mathbf{x}$ ,  $i$ , and  $j$ ; see Koole (2004). The expected profit in our model is the expectation over several random variables, some of which depend on  $\mathbf{u}$ , thus complicating the proof. We therefore must use the concept of stochastic (sample-path) concavity; see Shanthikumar and Yao (1989).

Note that the expectation of the first two terms in function  $\Pi(\mathbf{u})$  in Equation (3),  $\mathbf{E}(\tilde{p}SV(\mathbf{u}) + \tilde{r}\min(CO(\mathbf{u}), \mathbf{1} \cdot \mathbf{FC}^{N+2}))$ , depend on  $\mathbf{u}$  only through the production volume  $PR(\mathbf{u})$ . We begin by showing that this term is concave in  $PR$ . From the definitions of  $SV$  and  $CO$ , we can write the first two terms in Equation (3) as:

$$\begin{aligned} \tilde{p}SV(PR) + \tilde{r}\min(CO(PR), \mathbf{1} \cdot \mathbf{FC}^{N+2}) &= \tilde{p} \min(D, (1 - PI)(CI + PR)) + \tilde{r}\min(CI + PR - \\ \min(D, (1 - PI)(CI + PR)), \mathbf{1} \cdot \mathbf{FC}^{N+2}) &= \\ \left\{ \begin{array}{ll} \tilde{p}(1 - PI)(CI + PR) + \tilde{r}\min(PI \cdot (CI + PR), \mathbf{1} \cdot \mathbf{FC}^{N+2}), & PR < \frac{D}{1-PI} - CI \\ \tilde{p}D + \tilde{r}\min(CI + PR - D, \mathbf{1} \cdot \mathbf{FC}^{N+2}), & PR \geq \frac{D}{1-PI} - CI \end{array} \right. \end{aligned} \quad (6)$$

Because the minimum of a constant and an increasing linear function is increasing and concave (see Simchi-Levi et al. 2004, p.15), it is obvious that the function in Equation (6) is increasing and concave in PR in each interval, left and right of point  $D/(1-PI)-CI$ .

The function is increasing and concave on its whole domain if (1) the left-side and the right-side limit of the function at point  $D/(1-PI)-CI$  are identical, and (2) if the left-side limit of the derivative at point  $D/(1-PI)-CI$  is greater than or equal to its right-side limit. Condition (1) clearly holds. To check for Condition (2), let us differentiate between two cases:  $\mathbf{1} \cdot \mathbf{FC}^{N+2} > D \cdot PI/(1 - PI)$  and  $\mathbf{1} \cdot \mathbf{FC}^{N+2} \leq D \cdot PI/(1 - PI)$ . In the first case, the derivative left of point  $D/(1-PI)-CI$  is given by  $\tilde{p}(1 - PI) + \tilde{r}PI$  and right of this point by  $\tilde{r}$ . From  $\tilde{p} > \tilde{r}$  (see the problem definition), it follows that  $\tilde{p}(1 - PI) + \tilde{r}PI > \tilde{r}$ . In the second case, the derivative left of point  $D/(1-PI)-CI$  is given by  $\tilde{p}(1 - PI) > 0$ , while it is zero to the right of this point. In all cases, the derivative left of point  $D/(1-PI)-CI$  is greater than to the right of this point, verifying condition (2) and consequently proving that the function in Equation (6) is concave and increasing in PR on its whole domain. The result extends to the expectation over D and CI.

Next, consider the production volume  $PR(\mathbf{u})$  as a function of the harvested fields,  $\mathbf{HF}(\mathbf{u})$ , instead of as a function of the planted fields,  $\mathbf{u}$ . Let  $Y_{ij}$  be a normally distributed random variable with index  $i$ , mean  $(1+PB_j)FS$ , and standard deviation  $FS(1+PB_j)PV_j$ . Let  $Z_j$  be a normal random variable with mean zero and standard deviation  $FS(1+PB_j)CPV_j$ . The production yield  $PY_j$  in country  $j$  can then be written as  $PY_j = \sum_{i=1}^{HF_j} Y_{i,j} + Z_j HF_j$ . With this expression,  $PY_j$  is strongly stochastically concave (see Shanthikumar and Yao 1989) in  $HF_j$ , which follows from the following argumentation: Let us define four random variables ( $PR_1 \sim PR(\mathbf{HF})$ ,  $PR_2 \sim PR(\mathbf{HF} + \mathbf{e}_i)$ ,  $PR_3 \sim PR(\mathbf{HF} + \mathbf{e}_j)$ , and  $PR_4 \sim PR(\mathbf{HF} + \mathbf{e}_i + \mathbf{e}_j)$ ) and let us couple these random variables such that  $PR_2 = PR_1 + Y_{1,i} + Z_i$ ,  $PR_3 = PR_1 + Y_{1,j} + Z_j$ , and  $PR_4 = PR_1 + Y_{1,i} + Y_{1,j} + Z_i + Z_j$ . Clearly,  $PR_1 + PR_4 = PR_2 + PR_3$

implies that  $\text{PR}(\mathbf{HF})$  is strongly stochastically linear (and therefore also nonstrictly stochastically concave) in  $\text{HF}_j$ . Because we have shown above that  $\mathbf{E}_{\text{D,CI}}(\tilde{p}SV(\text{PR}) + \tilde{r}\min(\text{CO}(\text{PR}), \mathbf{1} \cdot \mathbf{FC}^{N+2}))$  is an increasing and concave function in  $\text{PR}$ , it follows from the definition of strong stochastic concavity that  $\mathbf{E}_{\text{D,CI}}(\tilde{p}SV(\text{PR}(\mathbf{HF})) + \tilde{r}\min(\text{CO}(\text{PR}(\mathbf{HF})), \mathbf{1} \cdot \mathbf{FC}^{N+2}))$  is concave and submodular in the components of vector  $\mathbf{HF}$  (Shanthikumar and Yao 1989). The third term in the profit function, as we show in Equation (3),  $(\mathbf{c}^{\text{Field}} + FS\mathbf{c}^{\text{Prod}} \circ (\mathbf{1} + \mathbf{PB})) \cdot \mathbf{HF}$ , is linear and separable in the components of  $\mathbf{HF}$ . This proves that the expected profit,  $\mathbf{E}_{\text{D,CI,PR}(\mathbf{u})}\Pi(\mathbf{u})$ , as defined in Equation (1), is concave and submodular in the number of harvested fields  $\mathbf{HF}$ .

Next, we analyze how the expected profit depends on vector  $\mathbf{u}$  of planted fields instead of on the random vector of harvested fields  $\mathbf{HF}(\mathbf{u})$ . Recall that  $\text{HF}_j(u_j)$  is a binomially distributed random variable with  $u_j$  trials and success probability  $1 - \text{FL}_j$ , and that  $\text{HF}_j$  depends only on  $u_j$  and not on any other components of  $\mathbf{u}$ . Consequently, we can write  $\text{HF}_j(u_j)$  as the sum of  $u_j$  independent Bernoulli (binary) random variables,  $P_{j,n}$  (i.e.,  $\text{HF}_j(u_j + 1) = \sum_{n=1}^{u_j+1} P_{j,n} = \text{HF}_j(u_j) + P_{j,u_j+1}$ ), and the expected profit for a given  $P_{j,u_j+1}$  as  $\mathbf{E}\Pi(\mathbf{u} + \mathbf{e}_j | P_{j,u_j+1}) = \mathbf{E}\Pi(\mathbf{HF}(\mathbf{u}) + P_{j,u_j+1}\mathbf{e}_j)$ . Let us define two random Bernoulli random variables  $P_i$  and  $P_j$  with success probabilities of  $\text{FL}_i$  and  $\text{FL}_j$ , respectively. Then, we can write the second difference function (in  $i$  and  $j$ ) of the expected profit,  $\Delta_{i,j}\mathbf{E}\Pi(\mathbf{u})$ , for given values of  $P_i$  and  $P_j$  as  $\Delta_{i,j}\mathbf{E}\Pi(\mathbf{u} | P_i, P_j) = \mathbf{E}\Pi(\mathbf{u} + \mathbf{e}_i + \mathbf{e}_j | P_i, P_j) - \mathbf{E}\Pi(\mathbf{u} + \mathbf{e}_i | P_i) - \mathbf{E}\Pi(\mathbf{u} + \mathbf{e}_j | P_j) + \mathbf{E}\Pi(\mathbf{u}) = \mathbf{E}\Pi(\mathbf{HF}(\mathbf{u}) + P_i\mathbf{e}_i + P_j\mathbf{e}_j) - \mathbf{E}\Pi(\mathbf{HF}(\mathbf{u}) + P_i\mathbf{e}_i) - \mathbf{E}\Pi(\mathbf{HF}(\mathbf{u}) + P_j\mathbf{e}_j) + \mathbf{E}\Pi(\mathbf{HF}(\mathbf{u}))$ .

Two cases are possible:

1. If either  $P_i = 0$  or  $P_j = 0$  (or both), we obtain  $\Delta_{i,j}\mathbf{E}\Pi(\mathbf{u} | P_i, P_j) = 0$ .

2. If  $P_i = P_j = 1$ , we obtain  $\Delta_{i,j}\mathbf{E}\Pi(\mathbf{u}|P_i, P_j) = \mathbf{E}\Pi(\mathbf{HF}(\mathbf{u}) + \mathbf{e}_i + \mathbf{e}_j) - \mathbf{E}\Pi(\mathbf{HF}(\mathbf{u}) + \mathbf{e}_i) - \mathbf{E}\Pi(\mathbf{HF}(\mathbf{u}) + \mathbf{e}_j) + \mathbf{E}\Pi(\mathbf{HF}(\mathbf{u})) \leq 0$ , which follows from the concavity and submodularity of the expected profit in the components of  $\mathbf{HF}$ , as we showed in the first part of the proof.

Consequently, the expected value of  $\Delta_{i,j}\mathbf{E}\Pi(\mathbf{u})$  over  $P_i$  and  $P_j$  is nonpositive. This completes the proof that  $\mathbf{E}_{D,CI,PR(\mathbf{u})}\Pi(\mathbf{u})$  is concave and submodular in the components of  $\mathbf{u}$ .

### **Proof of Proposition 2**

For some vector  $\mathbf{u}(k)$  to minimize the deviation from the target production share, it must hold that  $|u_j(k) - kt_j| < 1$  for any  $j=1\dots J$ . Otherwise, if  $|u_j(k) - kt_j| \geq 1$ , Equation (2) could be further reduced by removing one unit from  $u_j(k)$  and adding this unit to some  $u_i(k)$  (if  $u_j(k) > kt_j$ ) or by adding one unit to  $u_j(k)$  and removing this unit from some  $u_i(k)$  (if  $u_j(k) < kt_j$ ). Consequently, it also holds for any  $j$  that

$$u_j(k') \geq m_j(\mathbf{u}(k')) > k't_j - 1 > kt_j - 1 \geq m_j(\mathbf{u}(k)) - 1$$

$$\Rightarrow u_j(k') \geq m_j(\mathbf{u}(k')) \geq m_j(\mathbf{u}(k)),$$

thus completing the proof.

## References

- Koole G (2004) Convexity in tandem queues. *Probability Engrg. Informational Sci.* 18(1):13–31.
- Simchi-Levi D, Chen X, Bramel J (2004) *The Logic of Logistics: Theory, Algorithms, and Applications for Logistics and Supply Chain Management*, 1st ed. (Springer, Berlin).
- Shanthikumar G, Yao D (1989) Second-order stochastic properties in queueing systems. *Proc. IEEE* 77(1):162–170.
